# Supplementary material for: Antagonistic Efficacy of Luteolin against Lead Acetate Exposure-Associated with Hepatotoxicity is Mediated via Antioxidant, Anti-Inflammatory, and Anti-Apoptotic Activities
Source: PubMed Central journal article supplement (PMC7022878; doi:10.3390/antiox9010010), 2019-12-21
Supplement: antioxidants-09-00010-s001.pdf [file antioxidants-09-00010-s001.pdf]

**Supplementary data Table S1.** Effect of luteolin (LUT, 50 mg/kg, orally) and/or lead acetate (PbAc, 20 mg/kg, i.p.) exposure in body weight, and food and water intake of male rats.

| <b>Groups</b>   | <b>Body weight (g)</b>  | <b>Food intake (g day<sup>-1</sup>)</b> | <b>Water intake (ml day<sup>-1</sup>)</b> |
|-----------------|-------------------------|-----------------------------------------|-------------------------------------------|
| <b>CNTR</b>     | 180.2±9.81              | 21.3±2.5                                | 28.9±2.2                                  |
| <b>LUT</b>      | 182.8±10.13             | 20.9±1.7                                | 29.3±1.9                                  |
| <b>PbAc</b>     | 155.6±9.56 <sup>a</sup> | 17.1±0.8 <sup>a</sup>                   | 26.1±2.1 <sup>a</sup>                     |
| <b>LUT+PbAc</b> | 170.6±9.45 <sup>b</sup> | 20.1±1.6 <sup>ab</sup>                  | 28.2±2.4 <sup>b</sup>                     |

The values represent the means ± SD (n = 7). <sup>a</sup> represents the statistical significance relative to that of the control group at  $p < 0.05$ . <sup>b</sup> represents the statistical significance relative to that of the PbAc-injected group at  $p < 0.05$ .
